# Supplementary material for: Do community measures impact the effectiveness of a community led HIV testing intervention. Secondary analysis of an HIV self-testing intervention in rural communities in Zimbabwe
Source: PubMed Central journal article supplement (PMC10617038; doi:10.1186/s12879-023-08695-x), 2023-10-31
Supplement: 12879_2023_8695_MOESM1_ESM.pdf [file 12879_2023_8695_MOESM1_ESM.pdf]

**Additional file 1: Distribution of surveyed population by community cohesion**

| Variable                            | Social Cohesion Measure |              |              | p-value |
|-------------------------------------|-------------------------|--------------|--------------|---------|
|                                     | Low                     | Medium       | High         |         |
| <b>Allocation</b>                   |                         |              |              |         |
| CBD                                 | 892                     | 1,784        | 2,791        | 0.001   |
| CLD                                 | 1,752                   | 2,408        | 1,523        |         |
| <b>Age (missing=8)</b>              |                         |              |              |         |
| 16-19 years                         | 413 (15.6)              | 712 (17.0)   | 698 (16.2)   |         |
| 20-25 years                         | 441 (16.7)              | 754 (18.0)   | 762 (17.7)   | 0.001   |
| 26-35 years                         | 636 (24.1)              | 1,004 (24.0) | 944 (21.9)   |         |
| 36-50 years                         | 729 (27.6)              | 1,027 (24.5) | 1,073 (24.9) |         |
| 50+ years                           | 425 (16.1)              | 691 (16.5)   | 833 (19.3)   |         |
| <b>Sex</b>                          |                         |              |              |         |
| Male                                | 1,170 (44.3)            | 1,916 (45.7) | 1,984 (46.0) | 0.342   |
| Female                              | 1,474 (55.8)            | 2,276 (54.3) | 2,330 (54.0) |         |
| <b>Ethnicity (missing=32)</b>       |                         |              |              |         |
| Shona                               | 1,920 (72.6)            | 3,194 (76.2) | 3,845 (89.1) | 0.001   |
| Ndebele                             | 406 (15.4)              | 576 (13.8)   | 233 (5.4)    |         |
| Other                               | 312 (11.8)              | 407 (9.7)    | 222 (5.2)    |         |
| <b>Religion</b>                     |                         |              |              |         |
| Apostolic                           | 976 (36.9)              | 1,638 (39.1) | 1,647 (38.2) | 0.201   |
| Non-Apostolic                       | 1,668 (63.1)            | 2,554 (60.9) | 2,667 (61.8) |         |
| <b>Salary</b>                       |                         |              |              |         |
| No                                  | 1,958 (74.1)            | 3,183 (75.9) | 3,302 (76.5) | 0.035   |
| Yes                                 | 663 (25.1)              | 956 (22.8)   | 957 (22.2)   |         |
| <b>Marital Status (missing=155)</b> |                         |              |              |         |
| Married                             | 1,605 (60.7)            | 2,558 (61.0) | 2,598 (60.2) | 0.620   |
| Never married                       | 602 (22.8)              | 994 (23.7)   | 1,005 (23.3) |         |
| Widowed/separated                   | 404 (15.3)              | 580 (13.8)   | 649 (15.0)   |         |
| <b>Education</b>                    |                         |              |              |         |
| None                                | 219 (8.3)               | 313 (7.5)    | 258 (6.0)    |         |
| Some primary                        | 873 (33.0)              | 1,437 (34.3) | 1,276 (29.6) | 0.001   |
| Some secondary                      | 587 (22.2)              | 1,119 (26.7) | 1,102 (25.5) |         |
| Qualifications                      | 965 (36.5)              | 1,323 (31.6) | 1,678 (38.9) |         |
| <b>Food Insecurity</b>              |                         |              |              |         |
| Little                              | 977 (38.6)              | 1,786 (44.3) | 2,177 (52.7) | 0.001   |
| Moderate                            | 887 (35.1)              | 1,455 (36.1) | 1,310 (31.7) |         |
| Severe                              | 666 (26.3)              | 794 (19.7)   | 641 (15.5)   |         |
| <b>Assets (missing= 5,391)</b>      |                         |              |              |         |
| Lowest                              | 637 (25.4)              | 679 (17.0)   | 593 (14.6)   |         |

|         |            |            |            |       |
|---------|------------|------------|------------|-------|
| Second  | 444 (17.7) | 840 (21.0) | 751 (18.4) | 0.001 |
| Middle  | 402 (16.0) | 794 (19.9) | 909 (22.3) |       |
| Fourth  | 432 (17.2) | 814 (20.4) | 927 (22.7) |       |
| Highest | 592 (23.6) | 868 (21.7) | 897 (22.0) |       |
