# Supplementary material for: Do community measures impact the effectiveness of a community led HIV testing intervention. Secondary analysis of an HIV self-testing intervention in rural communities in Zimbabwe
Source: PubMed Central journal article supplement (PMC10617038; doi:10.1186/s12879-023-08695-x), 2023-10-31
Supplement: 12879_2023_8695_MOESM2_ESM.pdf [file 12879_2023_8695_MOESM2_ESM.pdf]

**Additional file 2: Distribution of surveyed population by community HIV awareness**

| Variable                            | HIV Awareness Measure |              |              | p-value |
|-------------------------------------|-----------------------|--------------|--------------|---------|
|                                     | Low                   | Medium       | High         |         |
| <b>Allocation</b>                   |                       |              |              |         |
| CBD                                 | 2,170 (52.6)          | 1,979 (58.1) | 1,318 (36.4) | 0.001   |
| CLD                                 | 1,959 (47.4)          | 1425 (41.9)  | 2,299 (63.6) |         |
| <b>Age (missing=8)</b>              |                       |              |              |         |
| 16-19 years                         | 652 (15.8)            | 591 (17.4)   | 580 (16.0)   | 0.001   |
| 20-25 years                         | 697 (16.9)            | 644 (18.9)   | 616 (17.0)   |         |
| 26-35 years                         | 896 (21.7)            | 769 (22.6)   | 919 (25.4)   |         |
| 36-50 years                         | 1,081 (26.2)          | 813 (23.9)   | 935 (25.9)   |         |
| 50+ years                           | 799 (19.4)            | 584 (17.2)   | 566 (15.7)   |         |
| <b>Sex</b>                          |                       |              |              |         |
| Male                                | 1,879 (45.5)          | 1,558 (45.8) | 1,633 (45.2) | 0.871   |
| Female                              | 2,250 (54.5)          | 1,846 (54.2) | 1,984 (54.9) |         |
| <b>Ethnicity (missing=32)</b>       |                       |              |              |         |
| Shona                               | 3,755 (90.9)          | 2,892 (87.6) | 2,222 (61.4) | 0.001   |
| Ndebele                             | 103 (2.5)             | 167 (4.9)    | 948 (26.2)   |         |
| Other                               | 255 (6.2)             | 247 (7.3)    | 439 (12.1)   |         |
| <b>Religion</b>                     |                       |              |              |         |
| Apostolic                           | 1,667 (40.4)          | 1,245 (36.6) | 1,349 (37.3) | 0.001   |
| Non-Apostolic                       | 2,462 (59.6)          | 2,159 (63.4) | 2,268 (62.7) |         |
| <b>Salary</b>                       |                       |              |              |         |
| No                                  | 3,191 (77.3)          | 2,580 (75.8) | 2,672 (73.9) | 0.006   |
| Yes                                 | 886 (21.5)            | 784 (23.0)   | 906 (25.0)   |         |
| <b>Marital Status (missing=155)</b> |                       |              |              |         |
| Married                             | 2,558 (62.0)          | 2,004 (58.9) | 2,199 (60.8) | 0.048   |
| Never married                       | 906 (21.9)            | 833 (24.5)   | 862 (23.8)   |         |
| Widowed/separated                   | 602 (14.6)            | 526 (15.5)   | 505 (14.0)   |         |
| <b>Education</b>                    |                       |              |              |         |
| None                                | 270 (6.5)             | 230 (6.8)    | 290 (8.0)    | 0.001   |
| Some primary                        | 1,324 (32.1)          | 994 (29.2)   | 1,268 (35.1) |         |
| Some secondary                      | 992 (24.0)            | 903 (26.5)   | 913 (25.2)   |         |
| Qualifications                      | 1,543 (37.4)          | 1,277 (37.5) | 1,146 (31.7) |         |
| <b>Food Insecurity</b>              |                       |              |              |         |
| Little                              | 2,033 (51.3)          | 1,473 (45.1) | 1,434 (41.4) | 0.001   |
| Moderate                            | 1,268 (32.0)          | 1,126 (34.5) | 1,258 (36.3) |         |
| Severe                              | 663 (16.7)            | 665 (20.4)   | 773 (22.3)   |         |
| <b>Assets (missing= 5,391)</b>      |                       |              |              |         |
| Lowest                              | 558 (14.3)            | 582 (18.1)   | 769 (22.4)   |         |

|         |             |            |            |       |
|---------|-------------|------------|------------|-------|
| Second  | 733 (18.7)  | 687 (21.3) | 615 (17.9) |       |
| Middle  | 877 (22.4)  | 628 (19.5) | 600 (17.5) | 0.001 |
| Fourth  | 891 (22.8)  | 640 (19.8) | 642 (18.7) |       |
| Highest | 858 (21.90) | 688 (21.3) | 811 (23.6) |       |
