# Supplementary material for: Do community measures impact the effectiveness of a community led HIV testing intervention. Secondary analysis of an HIV self-testing intervention in rural communities in Zimbabwe
Source: PubMed Central journal article supplement (PMC10617038; doi:10.1186/s12879-023-08695-x), 2023-10-31
Supplement: 12879_2023_8695_MOESM3_ESM.pdf [file 12879_2023_8695_MOESM3_ESM.pdf]

**Additional file 3: Distribution of surveyed population by community problem solving**

| Variable                            | Problem Solving Measure |              |              | p-value |
|-------------------------------------|-------------------------|--------------|--------------|---------|
|                                     | Low                     | Medium       | High         |         |
| <b>Allocation</b>                   |                         |              |              |         |
| CBD                                 | 2,302 (56.9)            | 1,445 (44.1) | 1,720 (45.0) |         |
| CLD                                 | 1,746 (43.1)            | 1,834 (55.9) | 2,103 (55.0) |         |
| <b>Age (missing=8)</b>              |                         |              |              |         |
| 16-19 years                         | 691 (17.1)              | 500 (15.3)   | 632 (16.5)   |         |
| 20-25 years                         | 642 (15.9)              | 652 (19.9)   | 663 (17.3)   | 0.001   |
| 26-35 years                         | 821 (20.3)              | 897 (27.4)   | 866 (22.7)   |         |
| 36-50 years                         | 1,029 (25.4)            | 810 (24.7)   | 990 (25.9)   |         |
| 50+ years                           | 861 (21.3)              | 417 (12.7)   | 671 (17.6)   |         |
| <b>Sex</b>                          |                         |              |              |         |
| Male                                | 1,732 (42.8)            | 1,647 (50.2) | 1,691 (44.2) | 0.001   |
| Female                              | 2,316 (57.2)            | 1,632 (49.8) | 2,132 (55.8) |         |
| <b>Ethnicity (missing=32)</b>       |                         |              |              |         |
| Shona                               | 3,630 (89.7)            | 2,929 (89.3) | 2,400 (62.8) |         |
| Ndebele                             | 205 (5.1)               | 56 (1.7)     | 957 (25.0)   | 0.001   |
| Other                               | 199 (4.9)               | 286 (8.7)    | 456 (11.9)   |         |
| <b>Religion</b>                     |                         |              |              |         |
| Apostolic                           | 1595 (39.4)             | 1,359 (41.5) | 1,307 (34.2) | 0.001   |
| Non-Apostolic                       | 2,453 (60.6)            | 1,920 (58.6) | 2,516 (65.8) |         |
| <b>Salary</b>                       |                         |              |              |         |
| No                                  | 3,159 (78.0)            | 2,444 (74.5) | 2,840 (74.3) | 0.001   |
| Yes                                 | 844 (20.9)              | 787 (24.0)   | 945 (24.7)   |         |
| <b>Marital Status (missing=155)</b> |                         |              |              |         |
| Married                             | 2,421 (59.8)            | 2,074 (63.3) | 2,266 (59.3) |         |
| Never married                       | 919 (22.7)              | 746 (22.8)   | 936 (24.5)   | 0.001   |
| Widowed/separated                   | 655 (16.2)              | 408 (12.4)   | 570 (14.9)   |         |
| <b>Education</b>                    |                         |              |              |         |
| None                                | 253 (6.3)               | 224 (6.8)    | 313 (8.2)    |         |
| Some primary                        | 1,204 (29.7)            | 1,105 (33.7) | 1,277 (33.4) | 0.001   |
| Some secondary                      | 983 (24.3)              | 878 (26.8)   | 947 (24.8)   |         |
| Qualifications                      | 1,608 (39.7)            | 1,072 (32.7) | 1,286 (33.6) |         |
| <b>Food Insecurity</b>              |                         |              |              |         |
| Little                              | 1,986 (51.1)            | 1,551 (49.5) | 1,403 (38.2) | 0.001   |
| Moderate                            | 1,245 (32.1)            | 1,040 (33.2) | 1,367 (37.2) |         |
| Severe                              | 654 (16.8)              | 543 (17.3)   | 904 (24.6)   |         |
